# Supplementary material for: SnSe Nanosheets Mimic Lactate Dehydrogenase to Reverse Tumor Acid Microenvironment Metabolism for Enhancement of Tumor Therapy
Source: MDPI journal article supplement (doi:10.3390/molecules27238552), 2022-12-05
Supplement: s1 [file s1]

## **Supplementary information for**

### **SnSe Nanosheets Mimic Lactate Dehydrogenase to Reverse Tumor Acid**

#### **Microenvironment Metabolism for Enhancement of Tumor Therapy**

Heng Wang<sup>1†</sup>, Beilei Wang<sup>1†</sup>, Jie Jiang<sup>2†</sup>, Yi Wu<sup>1</sup>, Anning Song<sup>1</sup>, Xiaoyu Wang<sup>1</sup>, Chenlu

Yao<sup>1</sup>, Huaxing Dai<sup>1</sup>, Jialu Xu<sup>1</sup>, Yue Zhang<sup>1</sup>, Qingle Ma<sup>1</sup>, Fang Xu<sup>1</sup>, Ruibin Li<sup>2</sup>, Chao Wang<sup>1\*</sup>

<sup>1</sup> Institute of Functional Nano & Soft Materials (FUNSOM), Soochow University, Suzhou, 215123, China

<sup>2</sup> State Key Laboratory of Radiation Medicine and Protection, School for Radiological and Interdisciplinary Sciences (RAD-X), Collaborative Innovation Center of Radiation Medicine of Jiangsu Higher Education Institutions, Soochow University, Suzhou 215123, China

\* Corresponding author: Chao Wang: cwang@suda.edu.cn

†These authors contributed equally to this work .

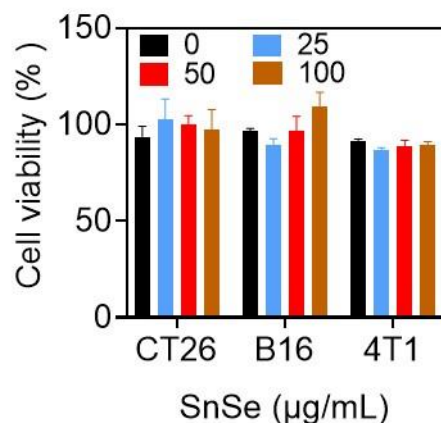

**Figure S1.** Cytotoxicity of SnSe NSs with various concentrations to cancer cells. Data are means  $\pm$  SD.

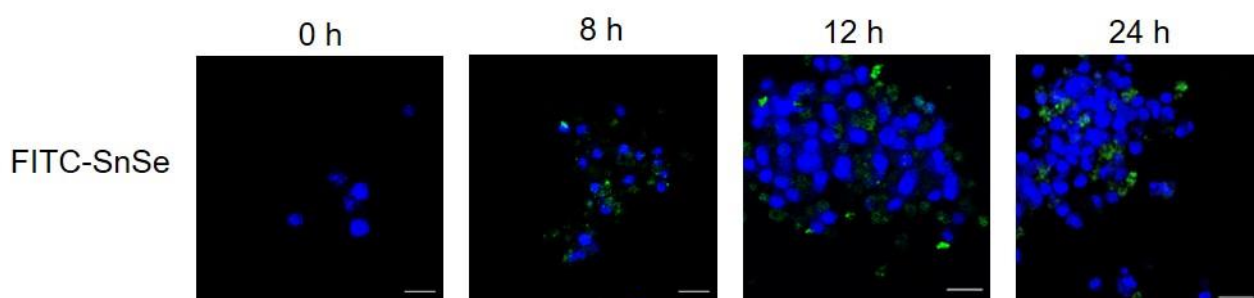

**Figure S2.** Confocal imaging of FITC-labelled SnSe NSs with different time points after incubation with RAW 264.7 cells for 24 h (blue: DAPI; green: FITC; Scale bar = 20  $\mu$ m).

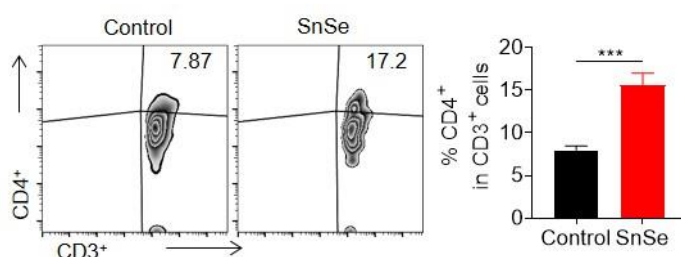

**Figure S3.** Representative flow cytometry zebra plots and statistical analyses of CD4<sup>+</sup> T cells in B16 tumor model after SnSe NSs treatments. Data are means  $\pm$  SD. Statistical significance between different groups was obtained by Student's *t* tests (two-tailed). *P*-value: \*\*\* *P* < 0.001. n.s., no significance. a.u., arbitrary units.
